# Supplementary material for: Ion specific effects of alkali cations on the catalytic activity of HIV-1 protease
Source: Royal Society of Chemistry journal article supplement (doi:10.1039/c2fd20094e), 2012-05-08
Supplement: c2fd20094e.pdf [file c2fd20094e.pdf]

**Figure S1:**

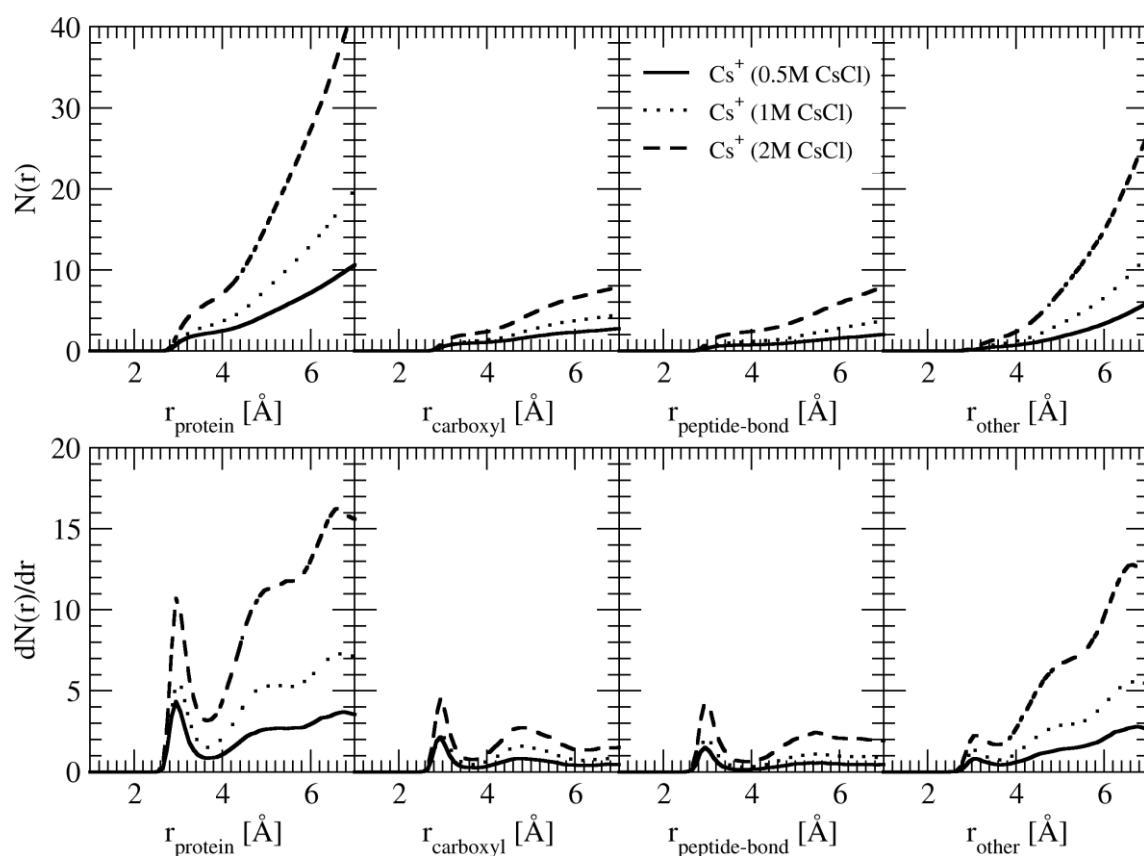

*Figure S1: The effect of salt concentration on distribution of  $\text{Cs}^+$  cations (the most weakly binding cation) to the protein surface. It should be stressed that the strongest interaction with carboxyl groups does not seem to rise linearly with the salt concentration. Apparently this may be related to the saturation; however, results for mixed sodium/potassium solution suggest that there are still many binding sites available. Panels have the same meaning as in the Figure 2.*
